# Supplementary material for: Single Au@MnO2 nanoparticle imaging for sensitive glucose detection based on H2O2-mediated etching of the MnO2 layer
Source: Royal Society of Chemistry journal article supplement (doi:10.1039/d2nj03107h), 2022-01-01
Supplement: d2nj03107h1.pdf [file d2nj03107h1.pdf]

## **Supporting Information**

### **Single Au@MnO<sub>2</sub> nanoparticle imaging for sensitive glucose detection based on etching of MnO<sub>2</sub> by H<sub>2</sub>O<sub>2</sub>**

Weizhen Xu,<sup>a</sup> Min Ouyang,<sup>a</sup> Hongmei Luo,<sup>a</sup> Dong Xu <sup>\*a</sup> and Qinlu Lin <sup>\*a</sup>

<sup>a</sup> National Engineering Laboratory for Rice and By-products Further Processing, College of Food Science and Engineering, Central South University of Forestry & Technology, Changsha, 410004, China

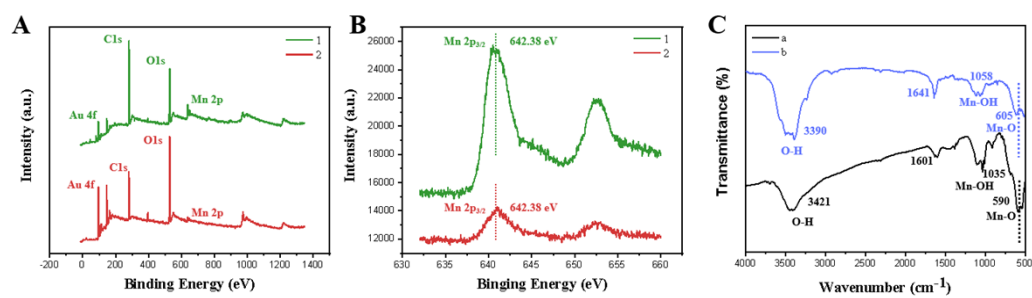

**Fig. S1** XPS survey spectra of Au@MnO<sub>2</sub> nanoparticles before (1) and after (2) incubation with H<sub>2</sub>O<sub>2</sub>. (A) Full spectra and (B) Mn 2p. (C) FTIR spectra of pure MnO<sub>2</sub> powder (a) and Au@MnO<sub>2</sub> nanoparticles (b).

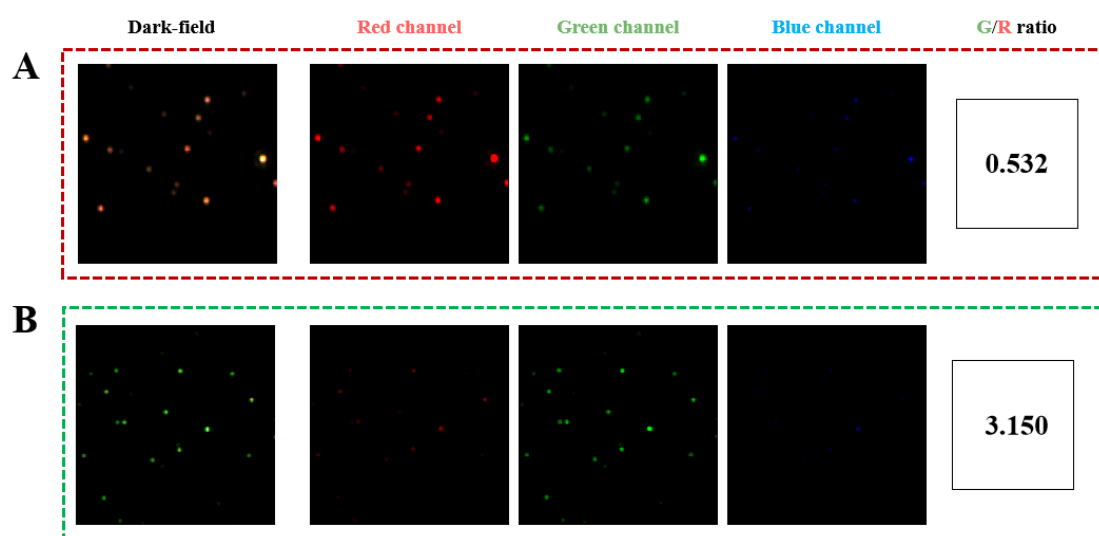

**Fig. S2** (A) DFM images of Au@MnO<sub>2</sub> nanoparticles and their separate red, green and blue channels. (B) DFM images of Au@MnO<sub>2</sub> nanoparticles incubation with glucose and GOx, and their separate red, green and blue channels. G/R ratio reflected the change to a large extent.

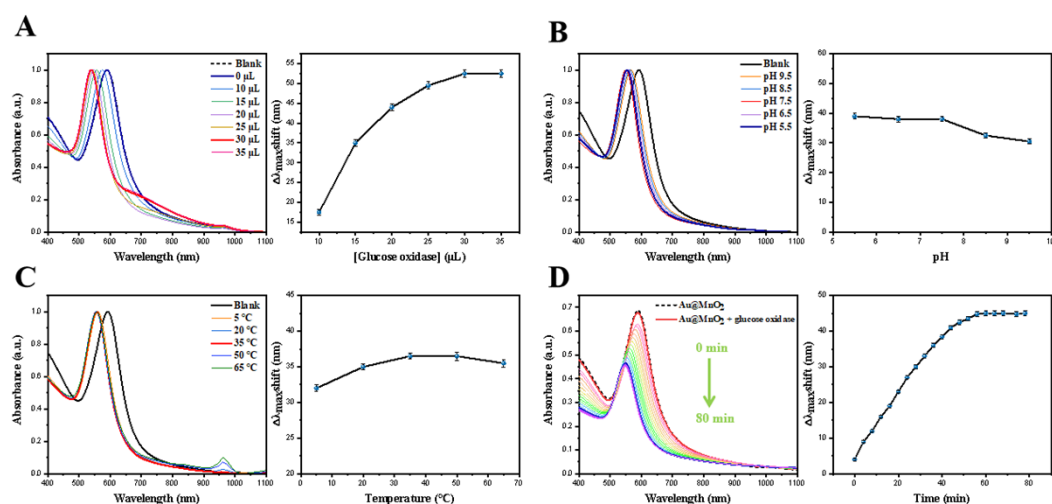

**Fig. S3** Optimization for reaction conditions. UV-Vis absorption spectra and the corresponding  $\Delta\lambda_{\text{max}}$  shift of Au@MnO<sub>2</sub> nanoparticles under different conditions. (A) GOx concentrations, (B) pH, (C) temperatures, and (D) reaction time.

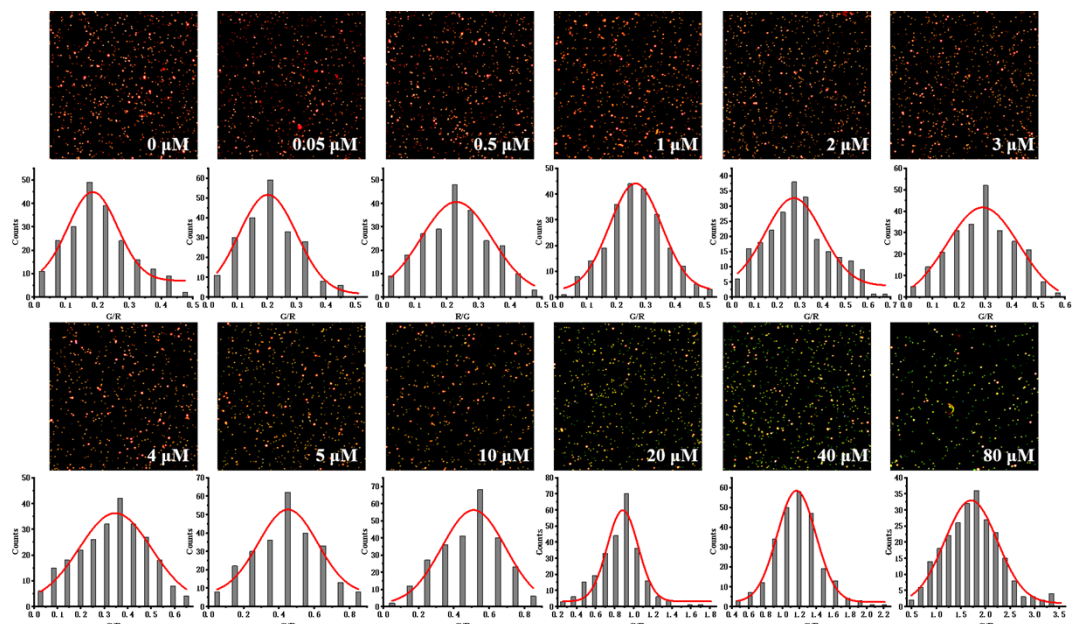

**Fig. S4** DFM images of Au@MnO<sub>2</sub> nanoparticles and the corresponding Gaussian fitting of G/R ratio in the presence of different glucose concentrations over the range of 0-80  $\mu\text{M}$ .

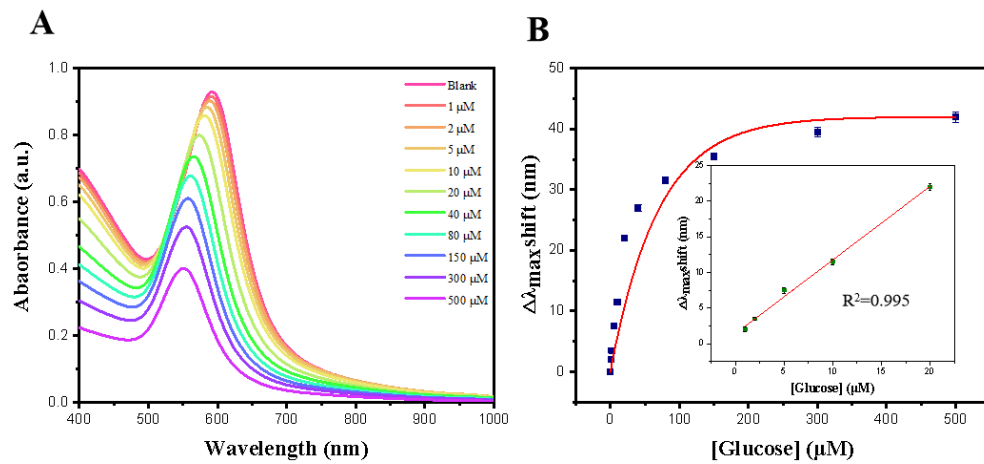

**Fig. S5** (A) UV-Vis spectra of Au@MnO<sub>2</sub> NPs solution in the presence of different concentrations of glucose solutions (1, 2, 5, 10, 40, 80, 150, 300 and 500 μM). (B) Dynamic range and linear range of  $\Delta\lambda_{\text{max}}$  shift (nm) of Au@MnO<sub>2</sub> NPs at different glucose concentrations. GOx (0.2 mg/mL): 30 μl, temperature: 35 °C, and reaction time: 50 min.

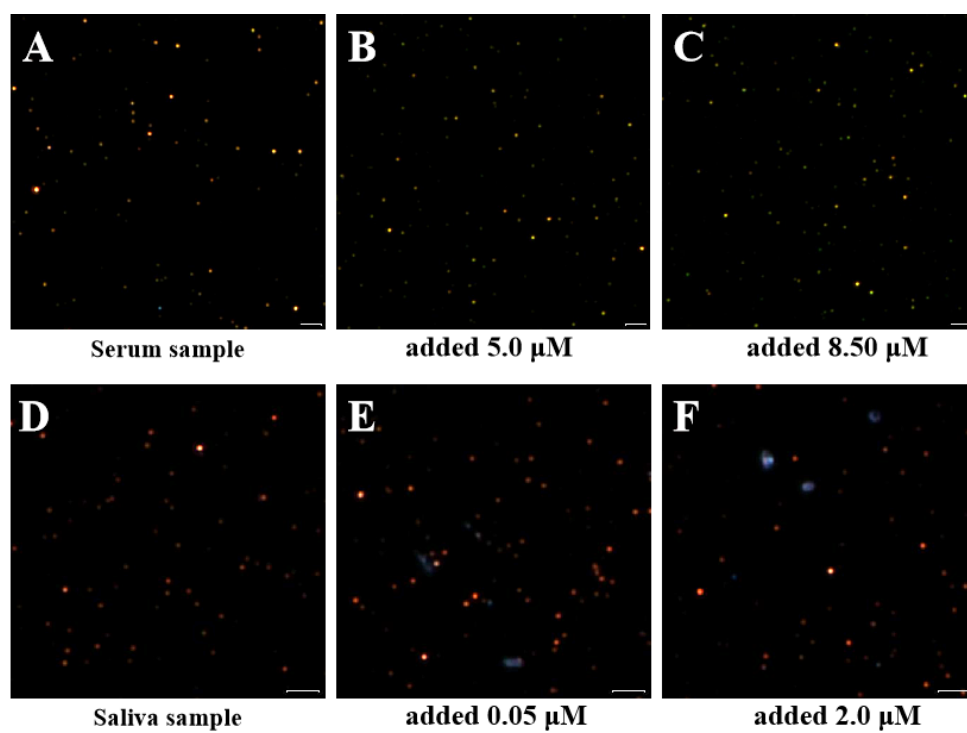

**Fig. S6** (A-C) Representative DFM images of the recovery assay in the human serum and (D-F) saliva samples spiked with different concentrations of glucose.

**Table 1.** Comparison of various glucose sensing systems.

| Method                               | Linear range ( $\mu\text{M}$ ) | LOD ( $\mu\text{M}$ ) | Ref                      |
|--------------------------------------|--------------------------------|-----------------------|--------------------------|
| fluorescence                         | 5-1000                         | 2.11                  | (Wang et al., 2019)      |
| fluorescence                         | 0.8-50                         | 0.11                  | (Zhou et al., 2021)      |
| colorimetry                          | 0.5-400                        | 0.17                  | (Chen et al., 2014)      |
| colorimetry                          | 18.3-421.6                     | 23.86                 | (Rashtbari et al., 2020) |
| colorimetry                          | 0-4000                         | 5.0                   | (Qian et al., 2021)      |
| colorimetry                          | 10-500                         | 3.66                  | (Hong et al., 2021)      |
| Single nanoparticle color<br>imaging | 0.05-20.0                      | 0.0129                | this work                |
